# Supplementary material for: Changes in HLA-B27 Transgenic Rat Fecal Microbiota Following Tofacitinib Treatment and Ileocecal Resection Surgery: Implications for Crohn’s Disease Management
Source: MDPI journal article supplement (doi:10.3390/ijms25042164), 2024-02-10
Supplement: s1 [file s1]

**Supplementary Materials:** The following supporting information can be downloaded at: [www.mdpi.com/xxx/s1](http://www.mdpi.com/xxx/s1), Figure S1: title; Table S1: title; Video S1: title.

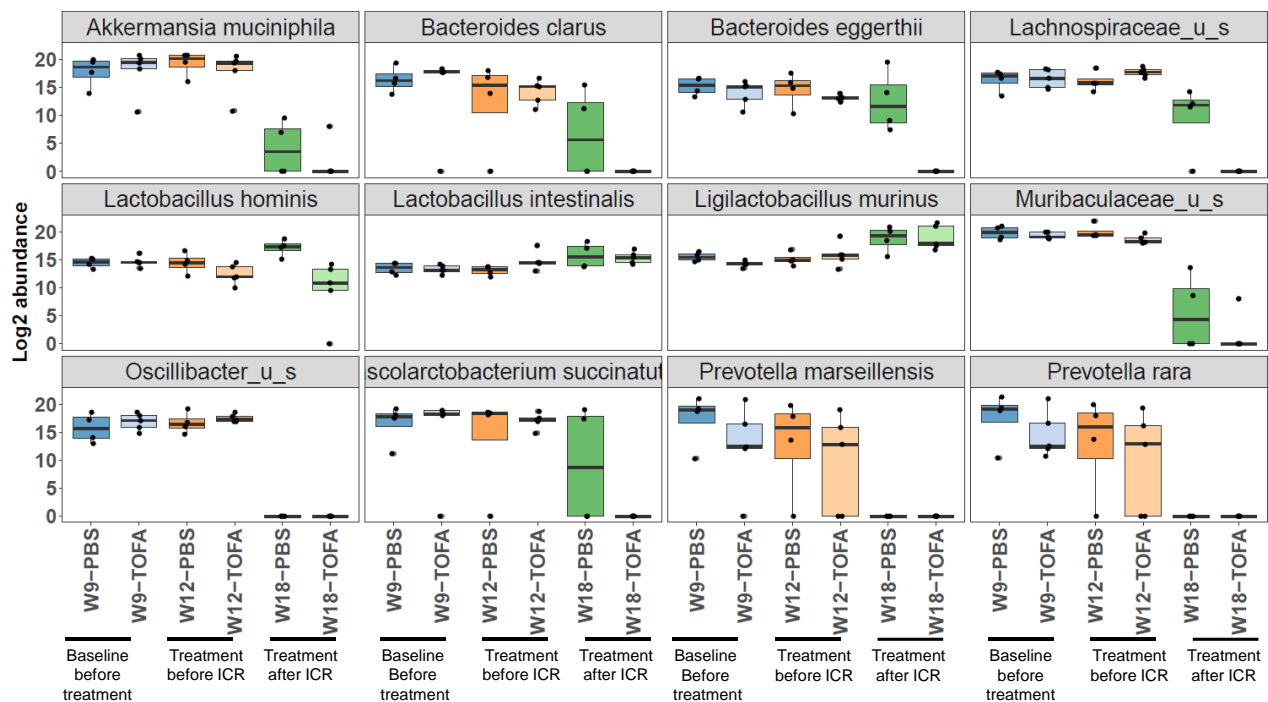

**Scheme 1.** Overall time-course impact of tofacitinib treatment and and ileocecal resection (ICR) on HLA-B27 Tg rat fecal microbiota. Data are expressed in Log2 abundance for the 12 most representative bacteria taxa.
